# Supplementary material for: Scoring and ranking probabilistic seismic hazard models: an application based on macroseismic intensity data
Source: Copernicus journal article supplement (doi:10.5194/nhess-2023-203), 2023-11-24
Supplement: Supplementary file 1 [file nhess-2023-203-supplement.pdf]

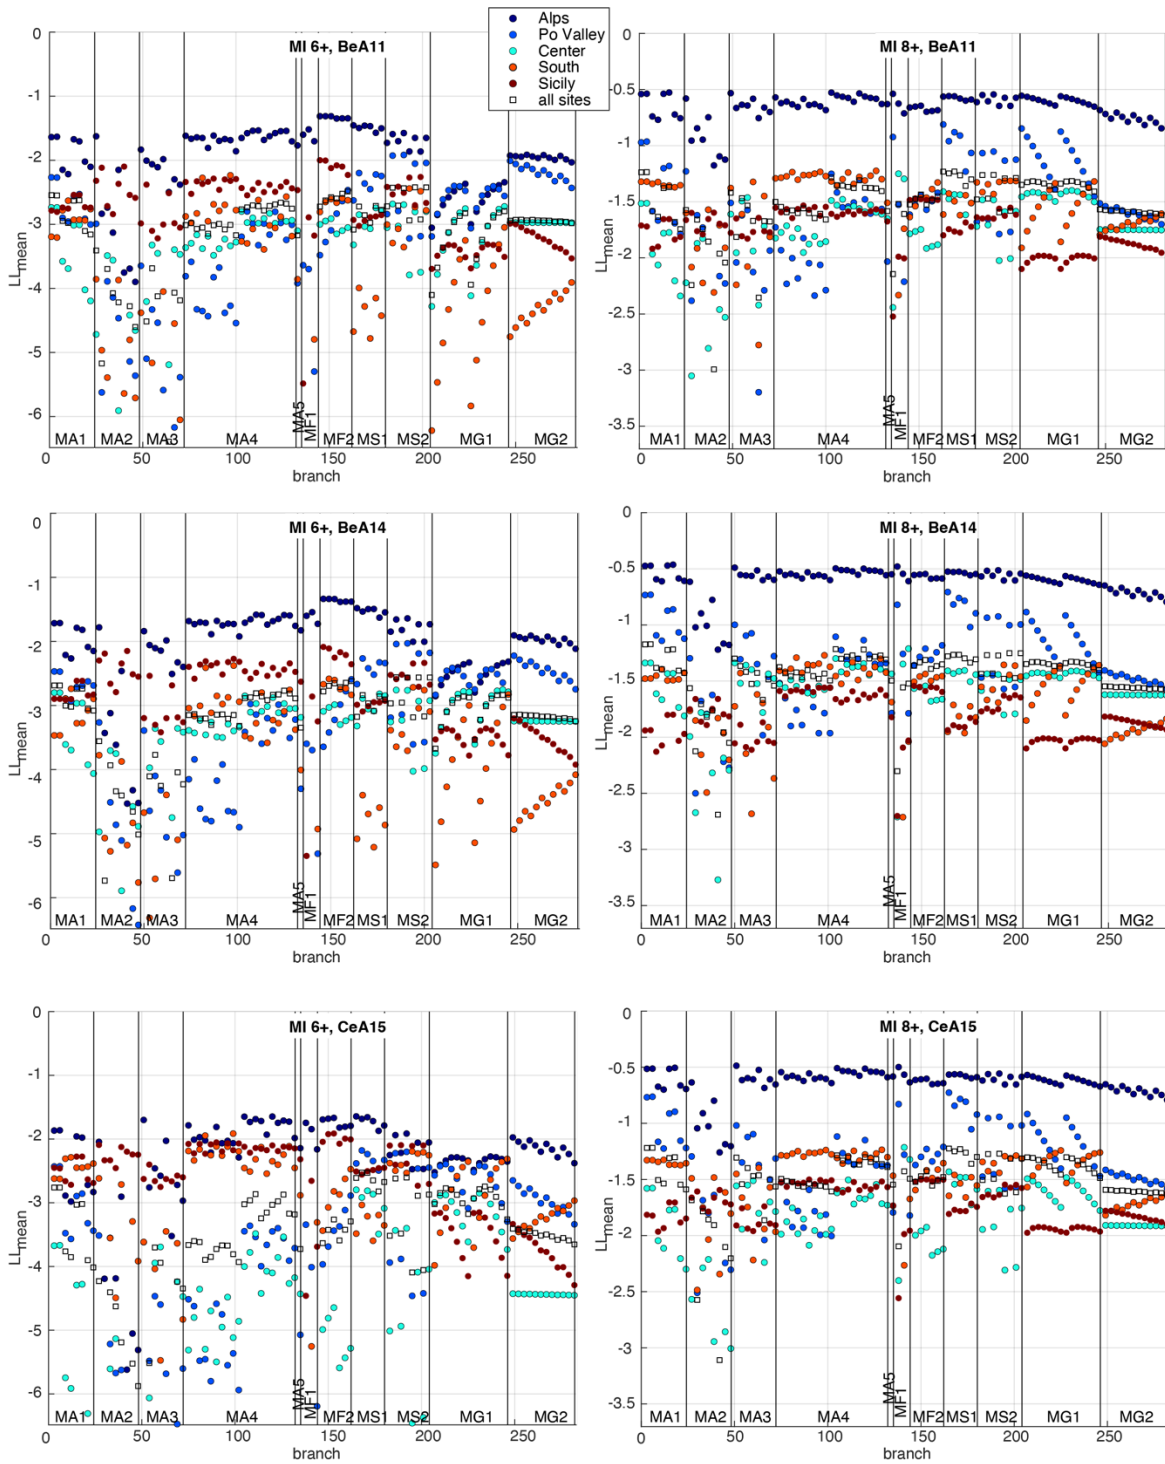

**Figure S1:** Values of  $LL_{mean}$  for each considered branch of MPS19 for the localities in five macro-areas and for all the sites, for SA 0.2 s, MI6+ (left) and MI8+ (right), and for each GMM (“BeA11”: Bindi et al., 2011; “BeA14”: Bindi et al., 2014; “CeA15”: Cauzzi et al., 2015). The branches are represented in abscissa from left to right grouped according to the 11 seismicity models.

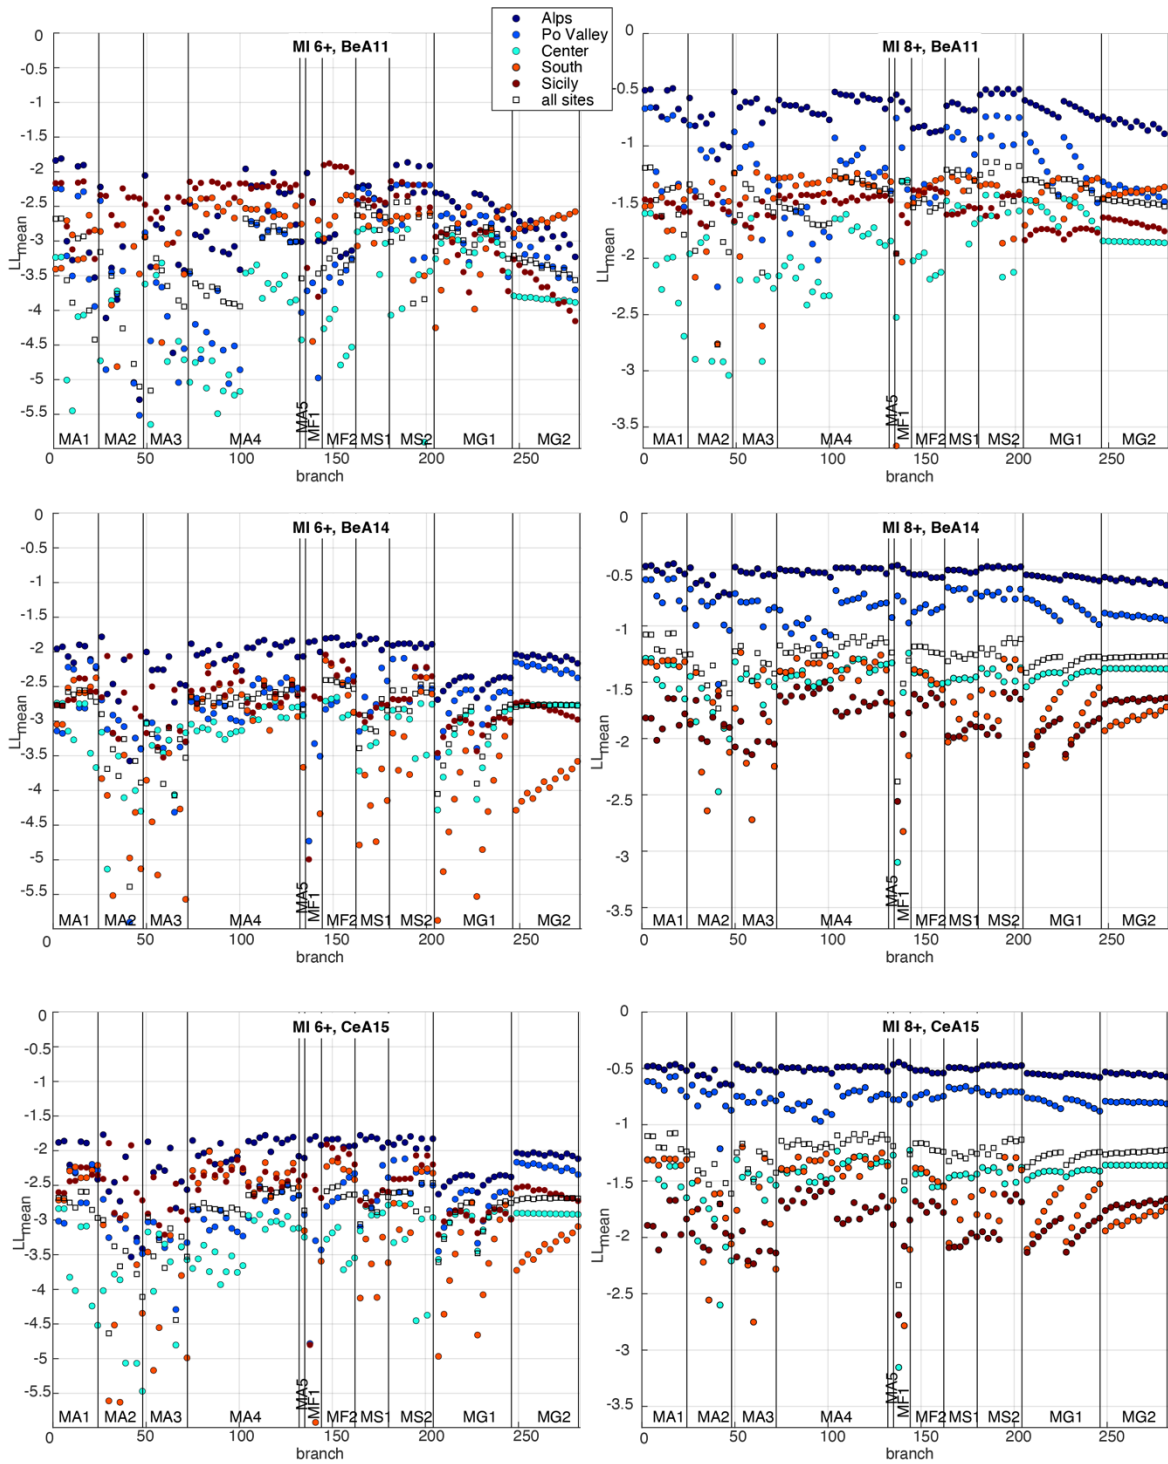

**Figure S2:** Values of  $LL_{\text{mean}}$  for each considered branch of MPS19 for the localities in five macro-areas and for all the sites, for SA 1 s, MI6+ (left) and MI8+ (right), and for each adopted GMM. The branches are represented in abscissa from left to right grouped according to the 11 seismicity models.

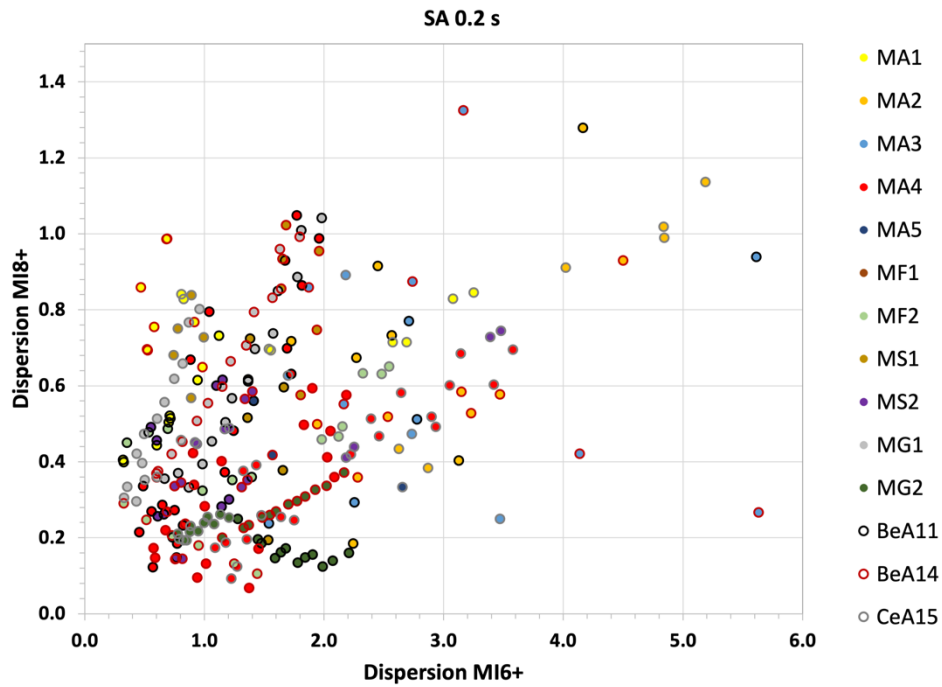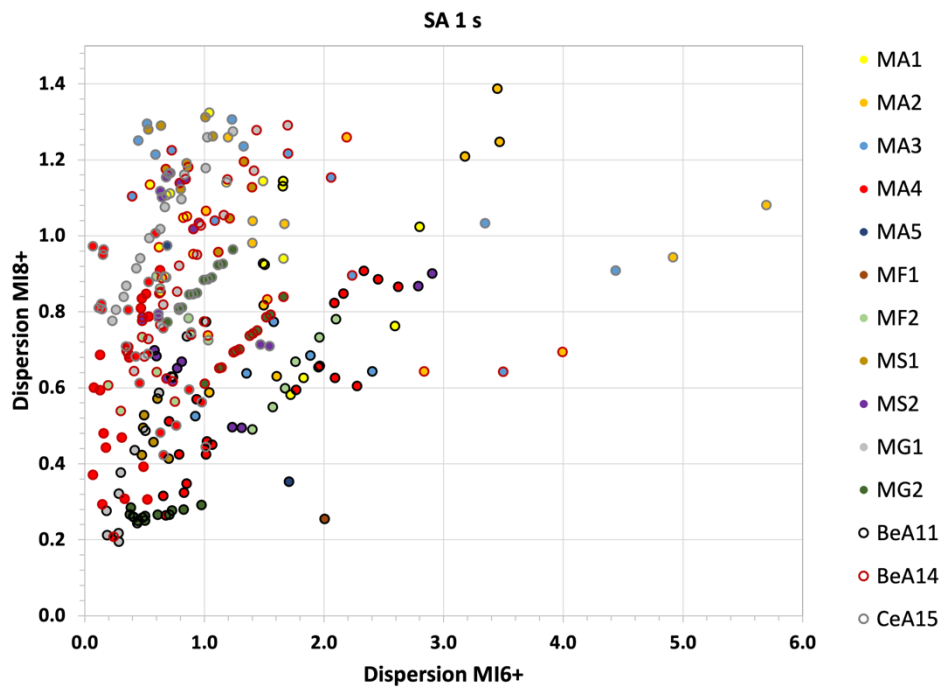

Figure S3: Dispersion of the  $LL_{\text{mean}}$  values among the four more representative macro-areas for each branch, for SA 0.2 s (top) and 1 s (bottom), MI6+ and MI8+. The color of the dots indicates the seismicity model, while the color of the borders indicates the GMM used in that branch.

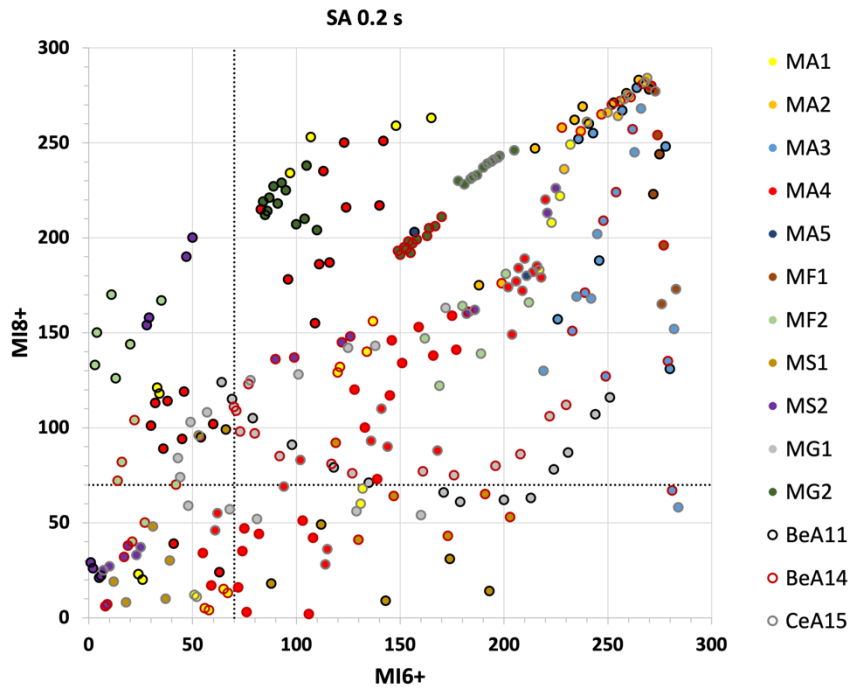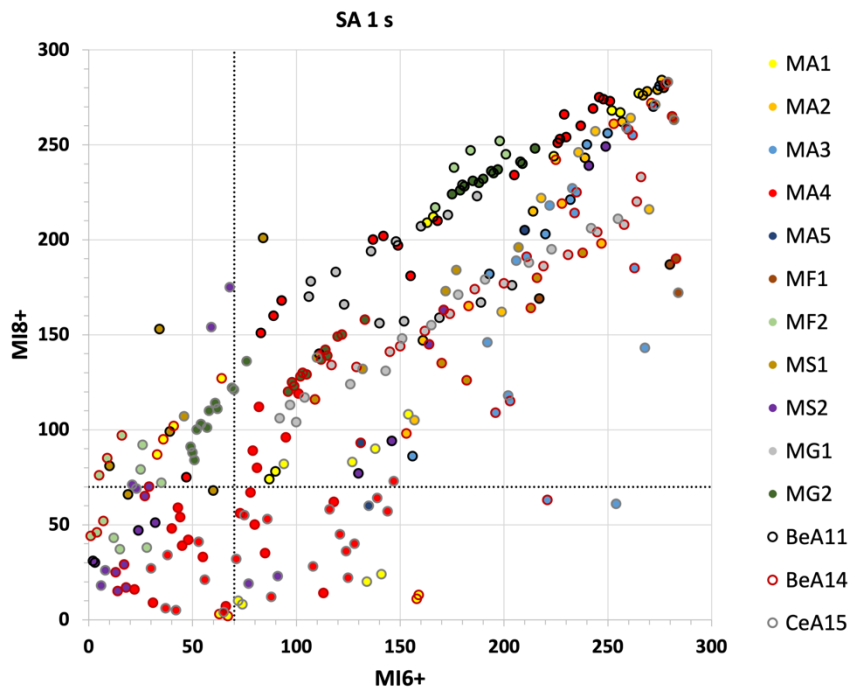

Figure S4: Comparison between the ranking of the branches for SA 0.2 s (top) and 1 s (bottom), based on the  $LL_{\text{mean}}$  values for MI6+ and MI8+. The color of the dots indicates the seismicity model, while the color of the borders indicates the GMM used in that branch. Black dotted lines identify the 70<sup>th</sup> position in both rankings.
